# Supplementary material for: Triphasic circularly polarized luminescence switch quantum simulation of a topologically chiral catenane
Source: Royal Society of Chemistry journal article supplement (doi:10.1039/d3tc04491b), 2024-01-01
Supplement: d3tc04491b1.pdf [file d3tc04491b1.pdf]

## SUPPORTING INFORMATION

### Triphasic circularly polarized luminescence switch quantum simulation of topologically chiral catenane

*Giovanni Bella, Marco Milone, Giuseppe Bruno, Antonio Santoro*

|                                                                                                    |   |
|----------------------------------------------------------------------------------------------------|---|
| <b>Figure S1.</b> Internal interactions in the optimized biprotonated form.....                    | 2 |
| <b>Figure S2.</b> Internal interactions in the optimized open form.....                            | 2 |
| <b>Figure S3.</b> Evolution in time and normal distribution of the excimer distance.....           | 2 |
| <b>Table S1.</b> Rotational strengths comparison between closed, biprotonated and open forms ..... | 3 |
| <b>Computational notes</b> (Molecular dynamics).....                                               | 4 |
| <b>Cartesian coordinates</b> .....                                                                 | 4 |

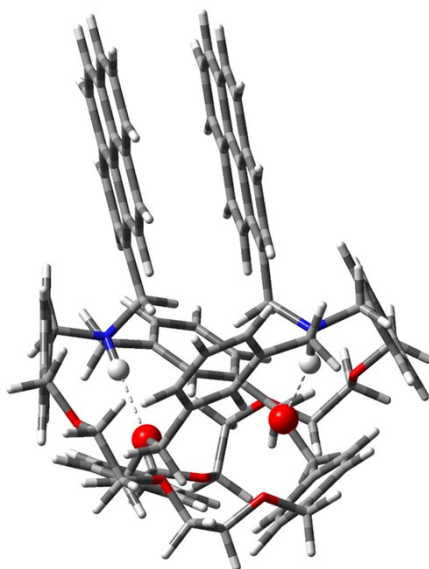

**Fig. S1.** Zoom of the optimized (LC-wHPBE/6-311G(d,p) level in gas phase) biprotonated form, ball and stick display format are related to the atoms involved in the hydrogen bonds.

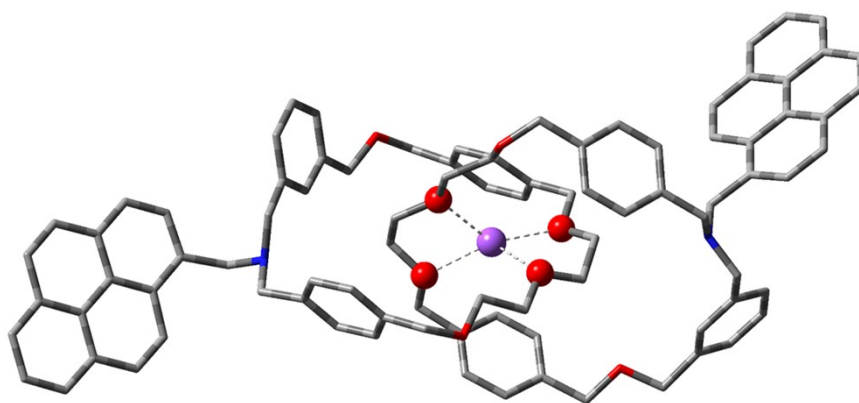

**Fig. S2.** Zoom of the optimized (LC-wHPBE/6-311G(d,p) level in gas phase) open form, ball and stick display format are related to the atoms involved in the cation entrapping. Hydrogens were omitted for clarity.

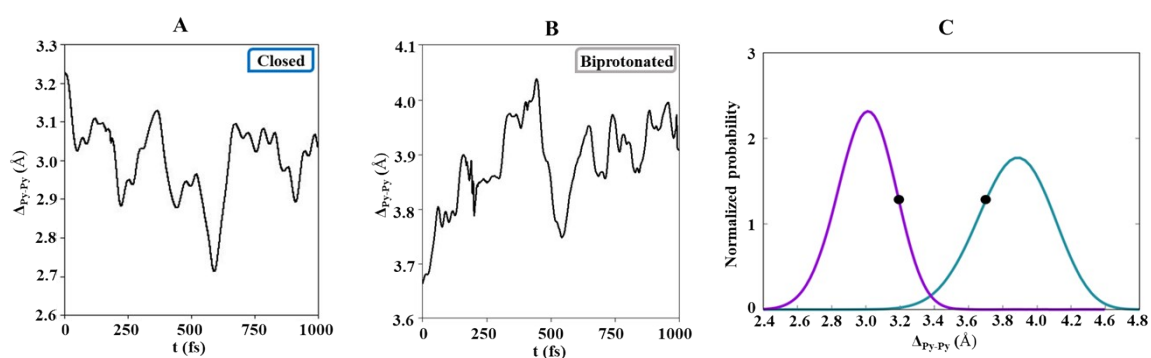

**Fig. S3.** (A,B) Pyrene-pyrene distance evolution plots of BOMD trajectories (S1) computed at LC-wHPBE/6-311G(d,p) level in solvent phase ( $\text{CH}_2\text{Cl}_2$ ) for closed and biprotonated forms, respectively. (C) Distribution functions of pyrene-pyrene distance as obtained from the first excited state molecular dynamics in dichloromethane for closed (blue) and biprotonated (grey) forms. Black circles indicate the relative values for the S0 optimization.

**Table S1.** Computed rotational strengths for closed, biprotonated and open forms as function of time.

| <b>Rlength (cgs units)</b> |                     |             | <b>Time (fs)</b> |
|----------------------------|---------------------|-------------|------------------|
| <b>Closed</b>              | <b>Biprotonated</b> | <b>Open</b> |                  |
| 69.8294                    | 110.2536            | 0.0020      | 0                |
| 25.3668                    | 40.0516             | 0.0001      | 40               |
| 28.2560                    | 44.6134             | 0.0000      | 80               |
| 31.2453                    | 90.3578             | 0.0000      | 120              |
| 30.6880                    | 77.5576             | 0.0000      | 160              |
| 57.2283                    | 50.9693             | 0.0001      | 200              |
| 32.2815                    | 95.9564             | 0.0000      | 240              |
| 28.0978                    | 60.0022             | 0.0000      | 300              |
| 60.7742                    | 53.1071             | 0.0000      | 340              |
| 33.6355                    | 81.1875             | 0.0006      | 380              |
| 51.4203                    | 186.9978            | 0.0007      | 420              |
| 118.4355                   | 186.7043            | 0.0006      | 460              |
| 118.2496                   | 170.3444            | 0.0000      | 500              |
| 99.4434                    | 157.0112            | 0.0001      | 540              |
| 110.0286                   | 173.7242            | 0.0000      | 580              |
| 81.1655                    | 128.1522            | 0.0000      | 620              |
| 126.1472                   | 199.1738            | 0.0000      | 660              |
| 92.5392                    | 178.5544            | 0.0000      | 700              |
| 97.0314                    | 146.1101            | 0.0000      | 740              |
| 157.8443                   | 153.2029            | 0.0000      | 780              |
| 175.9086                   | 249.2204            | 0.0001      | 820              |
| 156.9492                   | 261.0988            | 0.0001      | 880              |
| 170.9513                   | 277.7421            | 0.0001      | 920              |
| 122.3531                   | 247.8071            | 0.0000      | 960              |
| 111.0034                   | 269.9150            | 0.0000      | 1000             |

## Computational notes

For BOMD jobs all the initial structures (closed, biprotonated and open forms, see manuscript) were extracted as the minima of the optimization process (LC-wHPBE/6-311G(d,p) level), and placed into a unit cubic box (35 Å for edge, 42875 Å<sup>3</sup>). The effect of solvent has been taken into account by using the integral equation formalism for the polarizable continuum model (IEF-PCM, referred to simply as PCM), the default parameters of *Gaussian16* have been used for the construction of the cavity, built as the envelope of interlocked spheres centered on each atom of the solute (dichloromethane:  $\epsilon=8.93$ ). The excited state (S1) BOMD simulation consisted of an initial equilibration part followed by the accumulation run in the NVT ensemble, particularly, the first part subsisted in a first energy minimization (100 steps) processed by a Hessian-based algorithm that incorporates a predictor step on the local quadratic surface followed by a corrector step. The latter uses a fifth-order polynomial fitted to the energy, gradient, and Hessian at the beginning and end points of each step. The equations of motion have been integrated using a time step of 2fs in a time-width of 1ps, the isothermal conditions were set at 298K. After the production dynamics, 25 snapshots (for each compound) were captured for the TD-DFT processing, checking that the main structural features of the starting conformation were preserved along the trajectories.

## Cartesian coordinates in gas phase LC-wHPBE/6-311G(d,p)

### CLOSED

| Symbol | X         | Y          | Z          |
|--------|-----------|------------|------------|
| O      | 4.2465720 | 3.7503170  | -3.6367370 |
| O      | 3.5793960 | 5.7224550  | -1.4693910 |
| O      | 1.9089560 | 6.4406640  | 0.7299110  |
| C      | 4.9266930 | 3.9607160  | -2.4234030 |
| C      | 4.8436990 | 5.4033880  | -2.0023470 |
| C      | 3.5864740 | 6.9882420  | -0.8642650 |
| C      | 2.2260320 | 7.3202960  | -0.3170970 |
| C      | 4.6617040 | 2.5707820  | -4.3025070 |
| C      | 4.5373560 | 1.3321920  | -3.4529360 |
| C      | 3.2906180 | 0.9085610  | -3.0200790 |
| C      | 5.6605930 | 0.6532740  | -2.9979360 |
| C      | 3.1700060 | -0.1186350 | -2.1007020 |
| C      | 5.5391170 | -0.3774980 | -2.0829020 |
| C      | 4.2926310 | -0.7472840 | -1.5922420 |
| C      | 0.6956780 | 6.7687400  | 1.3693620  |

|   |            |            |            |
|---|------------|------------|------------|
| C | 0.2426060  | 5.5997210  | 2.1960410  |
| C | 1.1589890  | 4.8621050  | 2.9382050  |
| C | -1.0847040 | 5.2090320  | 2.1990250  |
| C | 0.7612720  | 3.7147710  | 3.5948110  |
| C | -1.4853330 | 4.0690570  | 2.8810930  |
| C | -0.5608240 | 3.2816300  | 3.5448640  |
| H | 2.4021100  | 1.4285170  | -3.3640740 |
| H | 2.1996320  | -0.4075250 | -1.7231630 |
| H | 6.6468570  | 0.9575440  | -3.3381820 |
| H | 6.4332510  | -0.8698540 | -1.7119930 |
| H | 1.4923470  | 3.1232120  | 4.1370910  |
| H | -2.5264310 | 3.7652250  | 2.8529030  |
| H | 2.1985140  | 5.1701220  | 2.9529370  |
| H | -1.8182940 | 5.7757660  | 1.6335720  |
| H | 0.8358790  | 7.6645580  | 1.9927030  |
| H | -0.0751680 | 7.0033470  | 0.6239720  |
| H | 1.4755540  | 7.2489180  | -1.1164180 |
| H | 2.2420130  | 8.3599110  | 0.0420230  |
| H | 3.8670450  | 7.7623440  | -1.5937860 |
| H | 4.3192590  | 7.0140030  | -0.0452220 |
| H | 5.6139900  | 5.5766460  | -1.2366090 |
| H | 5.0683710  | 6.0469950  | -2.8638640 |
| H | 5.9924790  | 3.7158440  | -2.5451050 |
| H | 4.5197310  | 3.3193220  | -1.6328810 |
| H | 4.0283120  | 2.5039500  | -5.1883270 |
| H | 5.7044030  | 2.6835610  | -4.6349450 |
| C | 4.1993120  | -1.7628360 | -0.4889250 |
| C | -0.9490540 | 1.9532200  | 4.1406750  |
| O | 2.9197290  | -1.7801200 | 0.1010560  |
| N | -0.5178640 | 0.8334780  | 3.3130130  |
| C | 2.8660000  | -2.7965850 | 1.0740040  |
| C | -0.4115140 | -0.3875810 | 4.0950480  |

|   |            |            |            |
|---|------------|------------|------------|
| C | 1.5967170  | -2.7630240 | 1.8795760  |
| C | 0.9296930  | -3.9554750 | 2.1285890  |
| C | 0.0409980  | -1.6145260 | 3.3380210  |
| C | -0.5997670 | -2.8234430 | 3.5806550  |
| C | 1.1301880  | -1.5954570 | 2.4717330  |
| C | -0.1638470 | -3.9876510 | 2.9735360  |
| H | 4.9415640  | -1.5117190 | 0.2796450  |
| H | 4.4538680  | -2.7654790 | -0.8595730 |
| H | 2.9750160  | -3.7756980 | 0.5936350  |
| H | 3.7170940  | -2.6821840 | 1.7617930  |
| H | 1.6288750  | -0.6583140 | 2.2497270  |
| H | -1.4474290 | -2.8545620 | 4.2591810  |
| H | -0.6784770 | -4.9236200 | 3.1628160  |
| H | 1.2736870  | -4.8661780 | 1.6506500  |
| H | -1.3456350 | -0.6299460 | 4.6259500  |
| H | 0.3267240  | -0.1903040 | 4.8812040  |
| H | -2.0350300 | 1.9283430  | 4.3216290  |
| H | -0.4624860 | 1.8438350  | 5.1137670  |
| C | -1.1725700 | 0.7563810  | 2.0120410  |
| H | -0.8354610 | 1.6227290  | 1.4475480  |
| H | -0.7583190 | -0.1122120 | 1.4972400  |
| C | -2.6905540 | 0.6641970  | 1.9573580  |
| C | -3.4812560 | 1.5432210  | 1.1960370  |
| C | -3.3217190 | -0.3819200 | 2.6229740  |
| C | -4.8904130 | 1.3813940  | 1.1772770  |
| C | -2.9266180 | 2.5946820  | 0.3727470  |
| C | -4.6900110 | -0.5477350 | 2.6030810  |
| H | -2.7185600 | -1.1113860 | 3.1465690  |
| C | -5.7157760 | 2.2618600  | 0.4085700  |
| C | -5.4975950 | 0.3329260  | 1.8963890  |
| C | -3.7026070 | 3.4136750  | -0.3559180 |
| H | -1.8546840 | 2.7284860  | 0.3188140  |

|   |            |            |            |
|---|------------|------------|------------|
| H | -5.1443230 | -1.3823210 | 3.1270030  |
| C | -5.1337030 | 3.2889370  | -0.3610130 |
| C | -7.1175110 | 2.0927580  | 0.3928640  |
| C | -6.9278730 | 0.1807380  | 1.8610410  |
| H | -3.2474890 | 4.1823790  | -0.9724880 |
| C | -5.9463180 | 4.1281840  | -1.1171180 |
| C | -7.8997690 | 2.9526160  | -0.3726280 |
| C | -7.6993670 | 1.0196510  | 1.1540760  |
| H | -7.3678880 | -0.6396270 | 2.4182900  |
| C | -7.3194230 | 3.9618580  | -1.1198690 |
| H | -5.4891360 | 4.9149950  | -1.7086080 |
| H | -8.9769140 | 2.8197110  | -0.3788620 |
| H | -8.7766790 | 0.8945390  | 1.1287400  |
| H | -7.9431980 | 4.6232710  | -1.7114030 |
| O | 7.7143790  | -2.6753020 | 2.0183020  |
| O | 6.3567830  | -4.6694490 | 0.2883750  |
| O | 3.9072480  | -5.7300990 | -0.8564120 |
| C | 7.8036900  | -2.7835900 | 0.6205320  |
| C | 7.6870430  | -4.2216690 | 0.1963070  |
| C | 6.2132340  | -5.9490640 | -0.2713170 |
| C | 4.8152490  | -6.4686540 | -0.0793260 |
| C | 7.8809900  | -1.3485540 | 2.4760050  |
| C | 6.6691210  | -0.4801910 | 2.2467340  |
| C | 5.5450100  | -0.6438710 | 3.0446940  |
| C | 6.6222060  | 0.4630670  | 1.2278650  |
| C | 4.4085560  | 0.1149320  | 2.8279590  |
| C | 5.4797670  | 1.2136270  | 1.0021030  |
| C | 4.3572870  | 1.0493570  | 1.8013320  |
| C | 2.6287920  | -6.3162800 | -0.8929260 |
| C | 1.6134660  | -5.3390330 | -1.4215770 |
| C | 2.0066760  | -4.1671640 | -2.0512370 |
| C | 0.2583560  | -5.5906110 | -1.2669690 |

|   |            |            |            |
|---|------------|------------|------------|
| C | 1.0646410  | -3.2505250 | -2.4740370 |
| C | -0.6845930 | -4.6773730 | -1.7137820 |
| C | -0.2925650 | -3.4862450 | -2.3067040 |
| H | 5.5598490  | -1.3800670 | 3.8424840  |
| H | 3.5442840  | -0.0247060 | 3.4691280  |
| H | 7.4927350  | 0.6106470  | 0.5946580  |
| H | 5.4517730  | 1.9272780  | 0.1864460  |
| H | 1.3919560  | -2.3255650 | -2.9352690 |
| H | -1.7417310 | -4.8909670 | -1.5867560 |
| H | 3.0616690  | -3.9681130 | -2.1877900 |
| H | -0.0711570 | -6.5046330 | -0.7797860 |
| H | 2.6532040  | -7.2209570 | -1.5184730 |
| H | 2.3308280  | -6.6324410 | 0.1175360  |
| H | 4.5426040  | -6.4128440 | 0.9832620  |
| H | 4.8023460  | -7.5261110 | -0.3809530 |
| H | 6.9089170  | -6.6532730 | 0.2086670  |
| H | 6.4436180  | -5.9252230 | -1.3458820 |
| H | 8.0370660  | -4.3023100 | -0.8433470 |
| H | 8.3439340  | -4.8386710 | 0.8249720  |
| H | 8.7779570  | -2.4003930 | 0.2795960  |
| H | 7.0188310  | -2.2007330 | 0.1276010  |
| H | 8.0815670  | -1.4317450 | 3.5453760  |
| H | 8.7629460  | -0.8953400 | 2.0012100  |
| C | 3.1359410  | 1.9052290  | 1.6078160  |
| C | -1.2937920 | -2.4692760 | -2.8041680 |
| O | 2.6494320  | 1.8261020  | 0.2881650  |
| N | -1.1151720 | -1.1417070 | -2.2277020 |
| C | 1.6383370  | 2.7955320  | 0.0817330  |
| C | -1.0004010 | -0.0843730 | -3.2075930 |
| C | 0.9109140  | 2.5904420  | -1.2194150 |
| C | 0.8185470  | 3.6522880  | -2.1045290 |
| C | -0.4156050 | 1.2267000  | -2.7203650 |



|   |            |            |            |
|---|------------|------------|------------|
| C | -0.5312210 | 2.3233300  | -3.5733540 |
| C | 0.2965930  | 1.3785020  | -1.5385480 |
| C | 0.0883580  | 3.5201330  | -3.2762320 |
| H | 3.3934890  | 2.9495600  | 1.8402520  |
| H | 2.3499250  | 1.6040120  | 2.3132550  |
| H | 0.9186740  | 2.7458270  | 0.9105890  |
| H | 2.0739500  | 3.8017880  | 0.1006510  |
| H | 0.4088320  | 0.5339210  | -0.8665510 |
| H | -1.0951200 | 2.2206510  | -4.4966360 |
| H | 0.0201310  | 4.3529120  | -3.9680770 |
| H | 1.3529740  | 4.5709760  | -1.8894230 |
| H | -1.9513360 | 0.1296760  | -3.7226400 |
| H | -0.3212570 | -0.4501400 | -3.9840570 |
| H | -2.3118570 | -2.8400500 | -2.6345550 |
| H | -1.1887000 | -2.3947260 | -3.8902310 |
| C | -1.9792670 | -0.8745810 | -1.0853610 |
| H | -1.6823300 | -1.5484980 | -0.2803460 |
| H | -1.7554900 | 0.1322320  | -0.7325800 |
| C | -3.4751420 | -0.9379860 | -1.3265060 |
| C | -4.3086092 | -1.9095269 | -0.7533685 |
| C | -4.0481467 | 0.0476557  | -2.1246314 |
| C | -5.7021038 | -1.8726841 | -1.0053635 |
| C | -3.8137325 | -2.9534100 | 0.1136874  |
| C | -5.4014952 | 0.0802728  | -2.3859056 |
| H | -3.4157250 | 0.8367574  | -2.5170657 |
| C | -6.5725741 | -2.8409575 | -0.4131114 |
| C | -6.2483506 | -0.8741443 | -1.8357463 |
| C | -4.6318570 | -3.8634184 | 0.6669849  |
| H | -2.7536985 | -3.0062156 | 0.3265995  |
| H | -5.8187088 | 0.8729632  | -2.9987923 |
| C | -6.0496848 | -3.8445300 | 0.4279611  |
| C | -7.9613708 | -2.7977038 | -0.6642254 |

|   |            |            |            |
|---|------------|------------|------------|
| C | -7.6666578 | -0.8544768 | -2.0768738 |
| H | -4.2300749 | -4.6353473 | 1.3158478  |
| C | -6.9089079 | -4.7780604 | 0.9987040  |
| C | -8.7903211 | -3.7487275 | -0.0759396 |
| C | -8.4807732 | -1.7669564 | -1.5239912 |
| H | -8.0625538 | -0.0742758 | -2.7189499 |
| C | -8.2683279 | -4.7293081 | 0.7477946  |
| H | -6.4997853 | -5.5485793 | 1.6443491  |
| H | -9.8570769 | -3.7130670 | -0.2726241 |
| H | -9.5492683 | -1.7446929 | -1.7127325 |
| H | -8.9275560 | -5.4636418 | 1.1977916  |

***BIPROTONATED***

| Symbol | X          | Y          | Z          |
|--------|------------|------------|------------|
| O      | 2.0464840  | -6.3287290 | -2.7339850 |
| O      | 4.2165240  | -6.3096560 | -0.6833140 |
| O      | 5.4116700  | -4.7294880 | 1.3024650  |
| C      | 2.1208980  | -7.1000480 | -1.5573170 |
| C      | 3.5487640  | -7.4312200 | -1.2122640 |
| C      | 5.4153960  | -6.6845070 | -0.0487960 |
| C      | 6.1827130  | -5.4654790 | 0.3792860  |
| C      | 0.8699210  | -6.4911020 | -3.4915130 |
| C      | -0.2682520 | -5.5981430 | -3.0521740 |
| C      | -0.7314160 | -4.5819420 | -3.8755840 |
| C      | -0.9030350 | -5.7883090 | -1.8289400 |
| C      | -1.7625870 | -3.7483140 | -3.4687770 |
| C      | -1.9072400 | -4.9369960 | -1.4101360 |
| C      | -2.3334930 | -3.8851470 | -2.2122900 |
| C      | 6.1022490  | -3.6459520 | 1.8791690  |
| C      | 5.0786730  | -2.7014840 | 2.4441000  |
| C      | 3.9190220  | -3.2122870 | 3.0169640  |
| C      | 5.2390770  | -1.3288960 | 2.3619010  |

|   |            |            |            |
|---|------------|------------|------------|
| C | 2.9074390  | -2.3629520 | 3.4119660  |
| C | 4.2273730  | -0.4744760 | 2.7706790  |
| C | 3.0330740  | -0.9866980 | 3.2499780  |
| H | -0.2910190 | -4.4551940 | -4.8601020 |
| H | -2.1456970 | -2.9944800 | -4.1526310 |
| H | -0.6211930 | -6.6258150 | -1.2002420 |
| H | -2.3907110 | -5.1124720 | -0.4549950 |
| H | 2.0052980  | -2.7738000 | 3.8547560  |
| H | 4.3665460  | 0.5974120  | 2.6903330  |
| H | 3.8104610  | -4.2857890 | 3.1180000  |
| H | 6.1516790  | -0.9119290 | 1.9485810  |
| H | 6.7868960  | -4.0008530 | 2.6614930  |
| H | 6.7046070  | -3.1236000 | 1.1252540  |
| H | 6.4171920  | -4.8427920 | -0.4941070 |
| H | 7.1274470  | -5.7897890 | 0.8345400  |
| H | 6.0498050  | -7.2683330 | -0.7295720 |
| H | 5.1989860  | -7.3074680 | 0.8297770  |
| H | 3.5327900  | -8.2391580 | -0.4670630 |
| H | 4.0644730  | -7.8023310 | -2.1069450 |
| H | 1.5819540  | -8.0471560 | -1.6964880 |
| H | 1.6725230  | -6.5703370 | -0.7076790 |
| H | 1.1369360  | -6.2546140 | -4.5226090 |
| H | 0.5440540  | -7.5394690 | -3.4666580 |
| C | -3.3849390 | -2.9349550 | -1.7235970 |
| C | 1.8861470  | -0.0910630 | 3.6044040  |
| O | -2.7745730 | -1.7898460 | -1.1143040 |
| N | 0.8095910  | -0.0724590 | 2.5461780  |
| C | -3.7642400 | -0.9847760 | -0.4785300 |
| C | -0.4709320 | 0.3873980  | 3.1789400  |
| C | -3.2210100 | -0.0434280 | 0.5627470  |
| C | -4.0382680 | 1.0314950  | 0.9025040  |
| C | -1.6569890 | 0.6187080  | 2.2778290  |

|   |            |            |            |
|---|------------|------------|------------|
| C | -2.4735850 | 1.6973740  | 2.5903480  |
| C | -2.0409470 | -0.2585740 | 1.2630340  |
| C | -3.6673100 | 1.8922110  | 1.9168220  |
| H | -4.0179920 | -3.4302320 | -0.9802450 |
| H | -4.0325040 | -2.6062300 | -2.5442490 |
| H | -4.3214650 | -0.4163130 | -1.2297210 |
| H | -4.4834140 | -1.6418550 | 0.0227760  |
| H | -1.4448880 | -1.1375290 | 1.0334350  |
| H | -2.1886380 | 2.3802240  | 3.3853190  |
| H | -4.3158310 | 2.7189950  | 2.1842480  |
| H | -4.9876820 | 1.1715430  | 0.3939130  |
| H | -0.2376400 | 1.2946030  | 3.7354200  |
| H | -0.7233830 | -0.3866850 | 3.9046670  |
| H | 2.1990790  | 0.9439330  | 3.7434600  |
| H | 1.4010130  | -0.4333120 | 4.5196500  |
| C | 1.1988960  | 0.6634640  | 1.2828470  |
| H | 1.8106510  | -0.0386330 | 0.7223420  |
| H | 0.2583580  | 0.7961070  | 0.7545880  |
| C | 1.8639810  | 2.0040980  | 1.4347360  |
| C | 3.1175870  | 2.2748090  | 0.8603940  |
| C | 1.1541560  | 3.0400040  | 2.0379310  |
| C | 3.6561820  | 3.5829000  | 0.9755970  |
| C | 3.8888940  | 1.3014450  | 0.1210660  |
| C | 1.6826980  | 4.3047420  | 2.1631820  |
| H | 0.1410730  | 2.8682780  | 2.3814430  |
| C | 4.9271020  | 3.8982830  | 0.4003340  |
| C | 2.9428090  | 4.5947270  | 1.6512530  |
| C | 5.0763230  | 1.6078330  | -0.4266020 |
| H | 3.5174020  | 0.2928010  | -0.0058620 |
| H | 1.1074940  | 5.0906810  | 2.6399670  |
| C | 5.6500010  | 2.9186990  | -0.3078020 |
| C | 5.4658040  | 5.1952500  | 0.5340740  |

|   |            |            |            |
|---|------------|------------|------------|
| C | 3.5158200  | 5.9078610  | 1.7770960  |
| H | 5.6294040  | 0.8537940  | -0.9779250 |
| C | 6.8826280  | 3.2397620  | -0.8665810 |
| C | 6.7041350  | 5.4808030  | -0.0336070 |
| C | 4.7180120  | 6.1910730  | 1.2526570  |
| H | 2.9504770  | 6.6642130  | 2.3103430  |
| C | 7.4056970  | 4.5126570  | -0.7284820 |
| H | 7.4352570  | 2.4804970  | -1.4102580 |
| H | 7.1188440  | 6.4772290  | 0.0762360  |
| H | 5.1478390  | 7.1814980  | 1.3582860  |
| H | 8.3693580  | 4.7519390  | -1.1631540 |
| H | 0.6551550  | -1.0520010 | 2.2500350  |
| O | -6.4126710 | -1.3384640 | 2.9647830  |
| O | -7.3395360 | 1.0801360  | 1.5268840  |
| O | -6.9430840 | 1.1661890  | -1.3152810 |
| C | -7.6663810 | -0.7239790 | 3.1705560  |
| C | -7.6631910 | 0.7616670  | 2.8605950  |
| C | -8.2927510 | 0.6493740  | 0.5836990  |
| C | -8.1663300 | 1.4628690  | -0.6742920 |
| C | -5.5549850 | -1.2833840 | 4.0734960  |
| C | -4.2707160 | -1.9942350 | 3.7477890  |
| C | -3.1782340 | -1.9117770 | 4.6001480  |
| C | -4.1632010 | -2.7575870 | 2.5953200  |
| C | -1.9838350 | -2.5361740 | 4.2759870  |
| C | -2.9639980 | -3.3549580 | 2.2636410  |
| C | -1.8495500 | -3.2294740 | 3.0810600  |
| C | -6.8098870 | 1.8474290  | -2.5452530 |
| C | -5.4357930 | 1.5503430  | -3.0683020 |
| C | -5.1693210 | 0.3347220  | -3.6870650 |
| C | -4.3968140 | 2.4461220  | -2.8710220 |
| C | -3.8759860 | -0.0023460 | -4.0393810 |
| C | -3.1027580 | 2.1175470  | -3.2353290 |

|   |            |            |            |
|---|------------|------------|------------|
| C | -2.8259020 | 0.8731680  | -3.7822850 |
| H | -3.2600760 | -1.3590590 | 5.5315590  |
| H | -1.1490870 | -2.4907450 | 4.9711570  |
| H | -5.0362000 | -2.8647780 | 1.9642620  |
| H | -2.8862580 | -3.9312090 | 1.3485260  |
| H | -3.6849410 | -0.9519250 | -4.5310340 |
| H | -2.3032890 | 2.8346330  | -3.0833480 |
| H | -5.9831010 | -0.3555750 | -3.8834950 |
| H | -4.5969880 | 3.4122550  | -2.4202630 |
| H | -7.5784600 | 1.5076410  | -3.2516600 |
| H | -6.9387150 | 2.9272700  | -2.4014700 |
| H | -8.2151230 | 2.5310610  | -0.4280370 |
| H | -9.0071030 | 1.2222500  | -1.3386750 |
| H | -9.3091970 | 0.7858270  | 0.9775150  |
| H | -8.1578000 | -0.4115560 | 0.3419610  |
| H | -8.6515210 | 1.1690480  | 3.1187360  |
| H | -6.9242350 | 1.2775000  | 3.4765280  |
| H | -8.0042350 | -0.8696130 | 4.2046670  |
| H | -8.3740810 | -1.2473400 | 2.5250340  |
| H | -5.3247900 | -0.2457180 | 4.3488090  |
| H | -6.0284220 | -1.7595080 | 4.9440700  |
| C | -0.5497270 | -3.8374440 | 2.6510770  |
| C | -1.4137890 | 0.4626340  | -4.0736040 |
| O | 0.0901210  | -3.0109110 | 1.6693360  |
| N | -0.7829510 | -0.2374000 | -2.8975040 |
| C | 0.9763060  | -3.7828360 | 0.8604650  |
| C | 0.3756610  | -1.0675990 | -3.3639190 |
| C | 1.5409120  | -2.9930890 | -0.2855230 |
| C | 2.9076020  | -3.0353660 | -0.5267550 |
| C | 1.2339900  | -1.6849710 | -2.2920360 |
| C | 2.6069640  | -1.7186370 | -2.5079280 |
| C | 0.7059600  | -2.3295770 | -1.1784560 |

|   |            |            |            |
|---|------------|------------|------------|
| C | 3.4357550  | -2.3998320 | -1.6369520 |
| H | -0.7353730 | -4.8204980 | 2.2063100  |
| H | 0.1218000  | -3.9868400 | 3.5041560  |
| H | 1.7942190  | -4.1802240 | 1.4685100  |
| H | 0.4148580  | -4.6323890 | 0.4554700  |
| H | -0.3667630 | -2.3522510 | -1.0051140 |
| H | 3.0308860  | -1.2371090 | -3.3843110 |
| H | 4.5001100  | -2.4526390 | -1.8341180 |
| H | 3.5578310  | -3.6053390 | 0.1289470  |
| H | 0.9721070  | -0.4433640 | -4.0273180 |
| H | -0.0649730 | -1.8566120 | -3.9741520 |
| H | -0.7737560 | 1.3151310  | -4.3047160 |
| H | -1.3755740 | -0.2389130 | -4.9080750 |
| C | -0.5254720 | 0.6716660  | -1.7291250 |
| H | -1.5180280 | 0.9230930  | -1.3691130 |
| H | -0.0739680 | 0.0162860  | -0.9887810 |
| C | 0.3055730  | 1.9109300  | -1.9364660 |
| C | -0.1059130 | 3.1324490  | -1.3674750 |
| C | 1.5446190  | 1.8468390  | -2.5659830 |
| C | 0.7260710  | 4.2728240  | -1.5050580 |
| C | -1.3240380 | 3.2899580  | -0.6060950 |
| C | 2.3482190  | 2.9570080  | -2.7082040 |
| H | 1.9241920  | 0.9020510  | -2.9278630 |
| C | 0.3376080  | 5.5290250  | -0.9433850 |
| C | 1.9553370  | 4.1842200  | -2.1918560 |
| C | -1.6829510 | 4.4742840  | -0.0812050 |
| H | -1.9770500 | 2.4452260  | -0.4257060 |
| H | 3.3072220  | 2.8712110  | -3.2067330 |
| C | -0.8729720 | 5.6475040  | -0.2341640 |
| C | 1.1672990  | 6.6606970  | -1.0905870 |
| C | 2.7864040  | 5.3511120  | -2.3229840 |
| H | -2.6058330 | 4.5544510  | 0.4843690  |

|   |            |            |            |
|---|------------|------------|------------|
| C | -1.2412680 | 6.8762150  | 0.3054860  |
| C | 0.7679400  | 7.8741810  | -0.5401080 |
| C | 2.4097130  | 6.5286020  | -1.8029850 |
| H | 3.7277120  | 5.2536020  | -2.8524750 |
| C | -0.4262750 | 7.9820180  | 0.1505540  |
| H | -2.1779570 | 6.9611310  | 0.8466300  |
| H | 1.4048020  | 8.7440150  | -0.6613800 |
| H | 3.0392120  | 7.4055410  | -1.9079220 |
| H | -0.7239620 | 8.9369980  | 0.5681210  |
| H | -1.4877940 | -0.8893270 | -2.5109550 |

**OPEN**

| Symbol | X          | Y          | Z          |
|--------|------------|------------|------------|
| O      | -1.7991910 | -0.6893990 | -0.9528220 |
| O      | -1.0847090 | 0.7472390  | 1.2709970  |
| O      | 0.8381350  | 0.8897740  | 4.2743560  |
| N      | 6.6105920  | -2.0862050 | 1.3715160  |
| C      | 6.0081410  | -3.9819790 | -1.2056070 |
| H      | 5.1911030  | -4.3101650 | -0.5693470 |
| C      | 5.9054180  | -4.1423310 | -2.5822780 |
| C      | 6.9556740  | -3.7315890 | -3.3887500 |
| H      | 6.8860770  | -3.8499660 | -4.4654070 |
| C      | 8.0991260  | -3.1876800 | -2.8269610 |
| H      | 8.9208000  | -2.8769780 | -3.4623500 |
| C      | 8.1959940  | -3.0496220 | -1.4547790 |
| H      | 9.0958000  | -2.6318140 | -1.0134200 |
| C      | 7.1472050  | -3.4402130 | -0.6288230 |
| C      | 7.2618010  | -3.2917430 | 0.8676660  |
| H      | 6.7698080  | -4.1440850 | 1.3444620  |
| H      | 8.3249970  | -3.3579710 | 1.1356400  |
| C      | 6.5090400  | -2.0301510 | 2.8263570  |
| H      | 7.4325060  | -1.6800550 | 3.3059340  |



|   |            |            |            |
|---|------------|------------|------------|
| H | 6.3423790  | -3.0511180 | 3.1777000  |
| C | 5.3688530  | -1.1650020 | 3.3027630  |
| C | 4.1151180  | -1.7117870 | 3.5508130  |
| H | 3.9649730  | -2.7793660 | 3.4190870  |
| C | 3.0664030  | -0.9238880 | 3.9896750  |
| H | 2.0976480  | -1.3657220 | 4.1973580  |
| C | 3.2423800  | 0.4406800  | 4.1793990  |
| C | 4.4908420  | 0.9921830  | 3.9331200  |
| H | 4.6507760  | 2.0556240  | 4.0852310  |
| C | 5.5455680  | 0.1961700  | 3.5156460  |
| H | 6.5239390  | 0.6404460  | 3.3555770  |
| C | 2.1163780  | 1.2955750  | 4.7087920  |
| H | 2.0859580  | 1.2325190  | 5.7982850  |
| H | 2.2909650  | 2.3466700  | 4.4425570  |
| C | 0.6173810  | 1.0898610  | 2.9035700  |
| H | 1.2071610  | 0.3812870  | 2.3055960  |
| H | 0.9014710  | 2.1102400  | 2.6114270  |
| C | -0.8567800 | 0.8608090  | 2.6647830  |
| H | -1.1603200 | -0.0612390 | 3.1733740  |
| H | -1.4455370 | 1.6869450  | 3.0770980  |
| C | -2.4589460 | 0.5418300  | 0.9741430  |
| H | -3.0445660 | 1.4097920  | 1.2963950  |
| H | -2.8204450 | -0.3481450 | 1.5016540  |
| C | -2.6350420 | 0.3669420  | -0.5080430 |
| H | -3.6871810 | 0.1348170  | -0.7007660 |
| H | -2.3681730 | 1.2888320  | -1.0370010 |
| C | -2.0709610 | -1.1168940 | -2.2833250 |
| H | -2.0970420 | -0.2453520 | -2.9490240 |
| H | -3.0487170 | -1.6075230 | -2.3170840 |
| C | -0.9695040 | -2.0534690 | -2.6772900 |
| C | 0.2538290  | -1.5388850 | -3.0935400 |
| H | 0.3670520  | -0.4667910 | -3.2361790 |

|   |            |            |            |
|---|------------|------------|------------|
| C | 1.3277370  | -2.3755660 | -3.3306360 |
| H | 2.2869810  | -1.9691910 | -3.6290610 |
| C | 1.1970580  | -3.7486700 | -3.1637490 |
| C | -0.0311600 | -4.2660580 | -2.7806570 |
| H | -0.1491150 | -5.3375270 | -2.6527800 |
| C | -1.1057140 | -3.4258390 | -2.5372050 |
| H | -2.0557110 | -3.8451540 | -2.2224900 |
| C | 2.3740030  | -4.6481650 | -3.4097270 |
| H | 2.2043230  | -5.6294060 | -2.9467370 |
| H | 2.4949410  | -4.8135030 | -4.4903680 |
| C | 4.6957420  | -4.7949060 | -3.1848130 |
| H | 4.8162770  | -4.8748140 | -4.2725320 |
| H | 4.5845780  | -5.8142470 | -2.7891590 |
| O | -2.1521200 | 4.7017310  | -2.6039800 |
| O | 2.5301450  | -0.0978060 | -0.7711330 |
| O | 1.4635400  | -2.0229500 | 0.8441080  |
| O | -1.3169120 | -4.0105830 | 1.9058280  |
| N | -6.4794550 | 0.4791000  | -0.2164040 |
| C | -4.7492190 | 2.7247500  | -0.9578770 |
| H | -4.7919850 | 1.8414260  | -1.5869520 |
| C | -3.9861800 | 3.8197380  | -1.3483010 |
| C | -3.9547560 | 4.9479960  | -0.5452910 |
| H | -3.3592650 | 5.8007670  | -0.8470210 |
| C | -4.6810110 | 4.9702140  | 0.6353240  |
| H | -4.6668730 | 5.8579260  | 1.2582590  |
| C | -5.4163800 | 3.8671150  | 1.0282140  |
| H | -5.9684230 | 3.8896510  | 1.9632540  |
| C | -5.4474600 | 2.7207340  | 0.2400610  |
| C | -6.1461140 | 1.4901690  | 0.7704620  |
| H | -5.4676630 | 1.0197630  | 1.4895610  |
| H | -7.0283160 | 1.7990260  | 1.3519310  |
| C | -6.8412130 | -0.7749780 | 0.4434860  |

|   |            |            |            |
|---|------------|------------|------------|
| H | -7.2939020 | -1.4247170 | -0.3061390 |
| H | -7.6080390 | -0.6145030 | 1.2163330  |
| C | -5.6684040 | -1.5137800 | 1.0444550  |
| C | -4.8146930 | -2.2523840 | 0.2298490  |
| H | -4.9967850 | -2.2691340 | -0.8409390 |
| C | -3.7704520 | -2.9855850 | 0.7616880  |
| H | -3.1210430 | -3.5692530 | 0.1183300  |
| C | -3.5418810 | -2.9979480 | 2.1330460  |
| C | -4.3824370 | -2.2573730 | 2.9501480  |
| H | -4.2267430 | -2.2566250 | 4.0251250  |
| C | -5.4377030 | -1.5324690 | 2.4128160  |
| H | -6.1013800 | -0.9837100 | 3.0744060  |
| C | -2.4536980 | -3.8642080 | 2.7259130  |
| H | -2.1640440 | -3.4743170 | 3.7109510  |
| H | -2.8381570 | -4.8754310 | 2.8741770  |
| C | -0.5268600 | -2.8526890 | 1.8277120  |
| H | -0.2920300 | -2.4749650 | 2.8321700  |
| H | -1.0520690 | -2.0613890 | 1.2772490  |
| C | 0.7496090  | -3.2199790 | 1.1038210  |
| H | 1.3535530  | -3.8952000 | 1.7195510  |
| H | 0.5058970  | -3.7300790 | 0.1650640  |
| C | 2.7263080  | -2.2447110 | 0.2306780  |
| H | 2.5951170  | -2.7784640 | -0.7167550 |
| H | 3.3687450  | -2.8406830 | 0.8869490  |
| C | 3.3998330  | -0.9194330 | -0.0032580 |
| H | 3.6295260  | -0.4283260 | 0.9500230  |
| H | 4.3347950  | -1.1005490 | -0.5424820 |
| C | 3.1107360  | 1.1193850  | -1.2187080 |
| H | 3.8940400  | 0.9052010  | -1.9540540 |
| H | 3.5698160  | 1.6377850  | -0.3677100 |
| C | 2.0219600  | 1.9607240  | -1.8230090 |
| C | 1.0998980  | 2.5994810  | -1.0013070 |

|   |             |            |            |
|---|-------------|------------|------------|
| H | 1.2036780   | 2.5301130  | 0.0780590  |
| C | 0.0706490   | 3.3571170  | -1.5354270 |
| H | -0.6338820  | 3.8662860  | -0.8870700 |
| C | -0.0548590  | 3.5005840  | -2.9104120 |
| C | 0.8573460   | 2.8536880  | -3.7349350 |
| H | 0.7758030   | 2.9552570  | -4.8131910 |
| C | 1.8834040   | 2.0927380  | -3.1987230 |
| H | 2.5915380   | 1.6030170  | -3.8601620 |
| C | -1.1052930  | 4.4211560  | -3.4954620 |
| H | -0.6350260  | 5.3794330  | -3.7296180 |
| H | -1.4872740  | 4.0104090  | -4.4387050 |
| C | -3.1967490  | 3.7553110  | -2.6288400 |
| H | -2.7904640  | 2.7424790  | -2.7514640 |
| H | -3.8506650  | 3.9507690  | -3.4896650 |
| O | 3.5332630   | -4.0458350 | -2.8849610 |
| C | 6.9417310   | -0.8379510 | 0.7154960  |
| H | 6.1818490   | -0.1111280 | 1.0156570  |
| H | 6.8009910   | -0.9883540 | -0.3589890 |
| C | -7.5031670  | 0.9147920  | -1.1789180 |
| H | -7.5648310  | 0.1504990  | -1.9546440 |
| H | -7.1250800  | 1.8146280  | -1.6682050 |
| C | -8.8701310  | 1.2356840  | -0.6081970 |
| C | -9.9340050  | 0.3205880  | -0.5761420 |
| C | -9.0672310  | 2.5107660  | -0.0874230 |
| C | -11.1536880 | 0.6931070  | 0.0417970  |
| C | -9.8665190  | -0.9916790 | -1.1754930 |
| C | -10.2546770 | 2.8818480  | 0.5081280  |
| H | -8.2635070  | 3.2376030  | -0.1638420 |
| C | -12.2451170 | -0.2292150 | 0.1071880  |
| C | -11.3074100 | 1.9798250  | 0.5986700  |
| C | -10.8951870 | -1.8527930 | -1.1207990 |
| H | -8.9712820  | -1.2864480 | -1.7073330 |

|   |             |            |            |
|---|-------------|------------|------------|
| H | -10.3753940 | 3.8840410  | 0.9059520  |
| C | -12.1255580 | -1.5126270 | -0.4616660 |
| C | -13.4518080 | 0.1402710  | 0.7389000  |
| C | -12.5514390 | 2.3326590  | 1.2312610  |
| H | -10.8170800 | -2.8281840 | -1.5900450 |
| C | -13.1936280 | -2.4006500 | -0.3874610 |
| C | -14.4984380 | -0.7744260 | 0.7970010  |
| C | -13.5673250 | 1.4593970  | 1.3022640  |
| H | -12.6470320 | 3.3281440  | 1.6519090  |
| C | -14.3698520 | -2.0337780 | 0.2398820  |
| H | -13.0956290 | -3.3864160 | -0.8302420 |
| H | -15.4241480 | -0.4872200 | 1.2846870  |
| H | -14.5005450 | 1.7337260  | 1.7827670  |
| H | -15.1959010 | -2.7340120 | 0.2921960  |
| C | 8.3060840   | -0.1989370 | 0.9250270  |
| C | 8.5605880   | 1.0590170  | 0.3502510  |
| C | 9.3156510   | -0.8073630 | 1.6552800  |
| C | 9.8174690   | 1.6768440  | 0.5319460  |
| C | 7.5762290   | 1.7598620  | -0.4388100 |
| C | 10.5505310  | -0.2086200 | 1.8343950  |
| H | 9.1477750   | -1.7755990 | 2.1060740  |
| C | 10.0852070  | 2.9579080  | -0.0434480 |
| C | 10.8235510  | 1.0340540  | 1.2848450  |
| C | 7.8292680   | 2.9634890  | -0.9805370 |
| H | 6.6096920   | 1.3012570  | -0.6061760 |
| H | 11.3158380  | -0.7144920 | 2.4138390  |
| C | 9.0966840   | 3.6151630  | -0.8021250 |
| C | 11.3423710  | 3.5717460  | 0.1446070  |
| C | 12.0975920  | 1.6829660  | 1.4596840  |
| H | 7.0728390   | 3.4689390  | -1.5726410 |
| C | 9.3718510   | 4.8626280  | -1.3557050 |
| C | 11.5813040  | 4.8182640  | -0.4225760 |

|    |            |            |            |
|----|------------|------------|------------|
| C  | 12.3439210 | 2.8859220  | 0.9202870  |
| H  | 12.8569480 | 1.1717850  | 2.0420540  |
| C  | 10.6042230 | 5.4578010  | -1.1659330 |
| H  | 8.6075260  | 5.3644700  | -1.9401040 |
| H  | 12.5481200 | 5.2886250  | -0.2768190 |
| H  | 13.3063440 | 3.3674020  | 1.0575050  |
| H  | 10.8082500 | 6.4294660  | -1.6015160 |
| Na | 0.3366050  | -0.3149660 | -0.2572940 |
